# Supplementary material
Source: PubMed Central journal article supplement (PMC4755115)
Supplement: EMBJ-35-414-s001.pdf [file EMBJ-35-414-s001.pdf]

## Expanded View Figures

|                                            | patient #2                                             | patient #3                        | patient #4                                             | patient #6                        | patient #7                        | patient #8             | patient #9          | patient #10         | patient #11                       | patient #12         | patient #13                       |
|--------------------------------------------|--------------------------------------------------------|-----------------------------------|--------------------------------------------------------|-----------------------------------|-----------------------------------|------------------------|---------------------|---------------------|-----------------------------------|---------------------|-----------------------------------|
| <b>Sex</b>                                 | male                                                   | female                            | female                                                 | male                              | female                            | male                   | male                | male                | female                            | male                | female                            |
| <b>Age</b>                                 | 89                                                     | 78                                | 88                                                     | 46                                | 53                                | 57                     | 65                  | 51                  | 72                                | ND                  | 64                                |
| <b>Reason for hospitalization</b>          | Knee arthritis related to a flare of chondrocalcinosis | Treatment of rheumatoid arthritis | Knee arthritis related to a flare of chondrocalcinosis | Treatment of rheumatoid arthritis | Treatment of rheumatoid arthritis | ankylosing spondylitis | knee osteoarthritis | knee osteoarthritis | Treatment of rheumatoid arthritis | psoriatic arthritis | Treatment of rheumatoid arthritis |
| <b>VAS (/10)</b>                           | 8                                                      | 7                                 | 4                                                      | 1                                 | 3                                 | 4                      | 0                   | 5                   | 9                                 | 6                   | 9                                 |
| <b>Plasmatic C-reactive protein (mg/l)</b> | 94                                                     | 5                                 | ND                                                     | 1,1                               | ND                                | 1                      | 1                   | ND                  | ND                                | 47                  | 0.48                              |
| <b>Protein in synovial fluid (g/l)</b>     | 34                                                     | ND                                | ND                                                     | ND                                | 52,6                              | 27,3                   | ND                  | 36,6                | 31                                | ND                  | 30                                |
| <b>pH of synovial fluid</b>                | 7.45 ± 0.02                                            | 7,68                              | 7,75                                                   | 7,66                              | 7,77                              | 7,72                   | 7,85                | 7,76                | 7,61                              | 7,63                | 7.49 ± 0.01                       |
| <b>Estimated LPC concentration (µM)</b>    |                                                        |                                   |                                                        |                                   |                                   |                        |                     |                     |                                   |                     |                                   |
| <b>LPC 16:0</b>                            | 38                                                     | 65                                | 93                                                     | 165                               | 161                               | 169                    | 124                 | 135                 | 128                               | 104                 | 56                                |
| <b>LPC 18:1</b>                            | 12                                                     | 16                                | 20                                                     | 66                                | 40                                | 40                     | 40                  | 34                  | 43                                | 30                  | 21                                |
| <b>LPC 18:0</b>                            | 16                                                     | 28                                | 34                                                     | 67                                | 75                                | 65                     | 55                  | 61                  | 51                                | 44                  | 22                                |
| <b>LPC 20:4</b>                            | 6                                                      | 12                                | 9                                                      | 13                                | 16                                | 16                     | 19                  | 20                  | 21                                | 13                  | 8                                 |

Figure EV1. Detailed analysis of exudates from 11 patients.

ND, not determined.

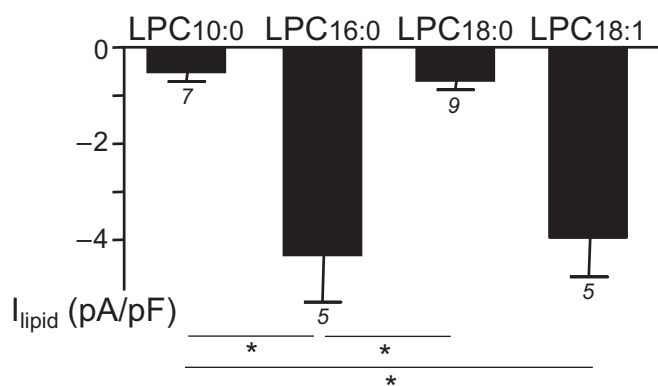

Figure EV2. Effects of LPC molecules containing different fatty acid chains on ASIC3-transfected cells at resting pH 7.4.

Current densities are measured at  $-80$  mV from F-11 cells following 30-s applications of LPC10:0, LPC16:0, LPC18:0, or LPC18:1 at  $10$   $\mu$ M ( $*P < 0.05$  Kruskal–Wallis test followed by a Dunn's *post hoc* test). The number of experiments ( $n$ ) is indicated below each bar graph, and error bars indicate  $\pm$  SEM.

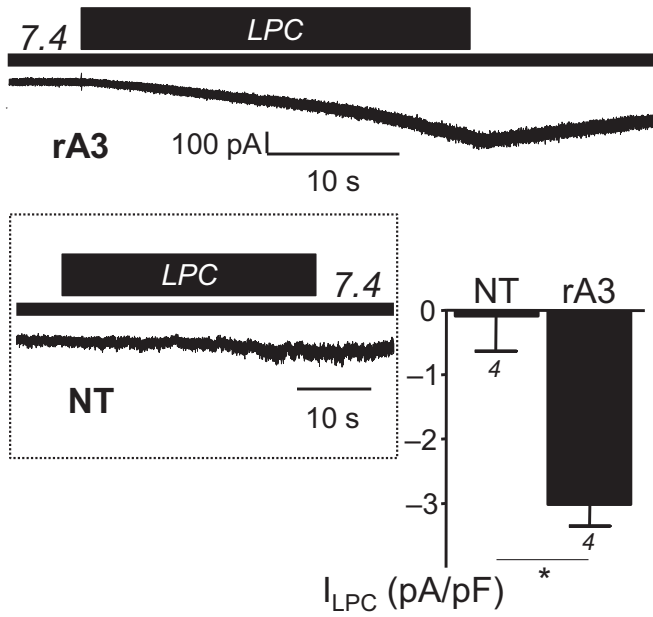

**Figure EV3. Activating effect of LPC on ASIC3 channels expressed in CHO cells.**

Rat ASIC3 (rA3) currents are generated by extracellular application of LPC (crude extract from bovine brain, 10  $\mu$ M) at resting pH 7.4. Current densities are measured at  $-80$  mV and are compared to the currents induced in non-transfected (NT) cells ( $*P < 0.05$ , Mann-Whitney  $U$ -test). The number of experiments ( $n$ ) is indicated below each bar graph, and error bars indicate  $\pm$  SEM.

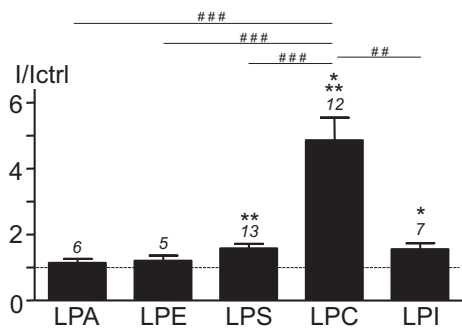

**Figure EV4. Effects of different lysophospholipids on acid-induced ASIC3 current.**

Comparison of the effects of LPA, LPE, LPS, LPC, and LPI at 10  $\mu$ M on the pH 7.0-induced current recorded from F-11 cells (each compound is applied for 3 min,  $*P < 0.05$ , and  $**P < 0.01$  and  $***P < 0.001$ , Wilcoxon test;  $##P < 0.01$  and  $###P < 0.001$ , Kruskal-Wallis test followed by a Dunn's *post hoc* test). The number of experiments ( $n$ ) is indicated above each bar graph, and error bars indicate  $\pm$  SEM.
